# Supplementary material for: Minimising contributions from scattering in infrared spectra by means of an integrating sphere
Source: Royal Society of Chemistry journal article supplement (doi:10.1039/c3an00381g), 2013-01-01
Supplement: c3an00381g.pdf [file c3an00381g.pdf]

Supplementary Material (ESI) for Analyst

Electronic supplementary information (ESI)

## **Minimising Contributions from Scattering in Infrared Spectra by Means of an Integrating Sphere**

**Alexandre Dazzi<sup>1</sup>, Ariane Deniset<sup>1</sup>, Peter Lasch<sup>2,\$</sup>**

<sup>1</sup> Laboratoire de Chimie Physique, UMR8000, Université Paris-Sud 11, 91405 Orsay, France.

<sup>2</sup> Robert Koch-Institute, Centre for Biological Security 6 (ZBS 6), Nordufer 20, 13353 Berlin, Germany

\$ corresponding author, e-mail: [LaschP@rki.de](mailto:LaschP@rki.de)

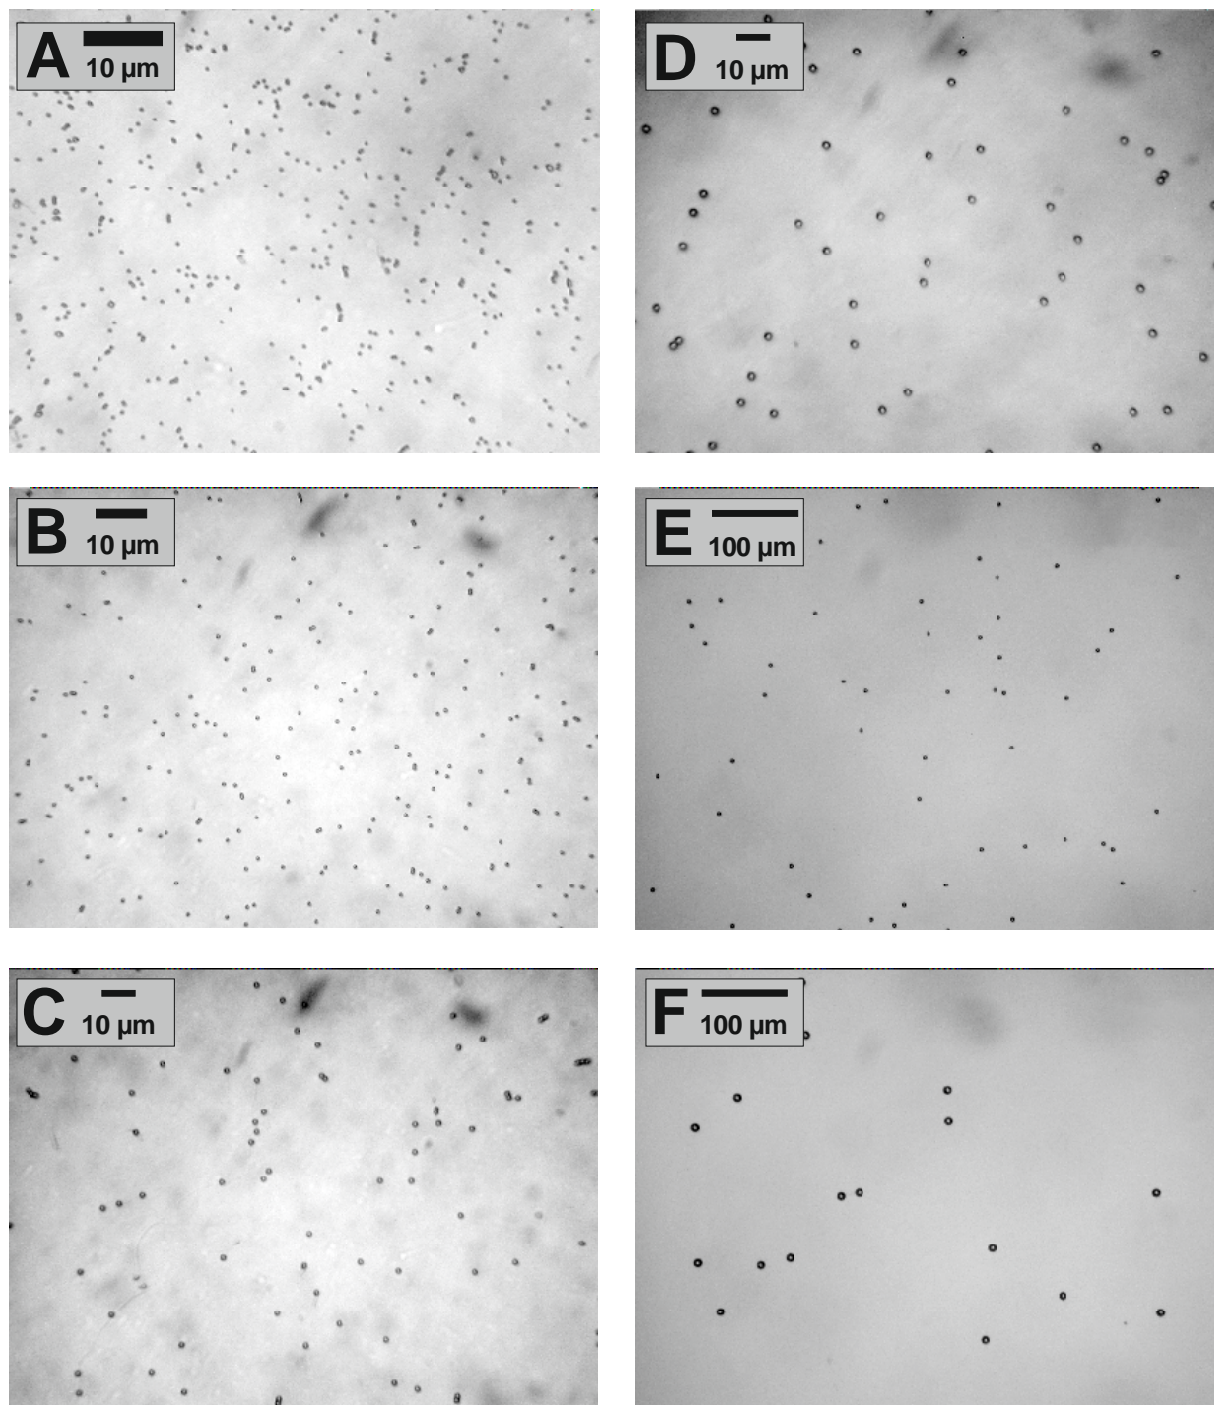

**Figure S1**

Light microscopy images of the PMMA microsphere preparations on ZnSe windows. These photographs demonstrate the absence of stacking and illustrate that contacts between individual microspheres can be considered an exception.

Radii  $r$  of the PMMA spheres:

A.)  $r = 0.242 \mu\text{m}$ , B.)  $r = 0.404 \mu\text{m}$ , C.)  $r = 0.62 \mu\text{m}$ , D.)  $r = 1.04 \mu\text{m}$ , E.)  $r = 2.31 \mu\text{m}$ , F.)  $r = 4.86 \mu\text{m}$ .
